## Validation of leadless atrioventricular synchronous pacing with Holter-ECG: a pilot study

S. Briongos Figuero, A. Estevez, A. Sanchez, S. Jimenez, E. Gomez, B. Jimenez-Candil, T. Ortega, M.A. Naranjo, M.A. Guimera, R.T. Garcia, R.T. Munoz-Aguilera

Public Hospital of Vallecas - Hospital Infanta Leonor, Madrid, Spain

Funding Acknowledgement: Type of funding sources: None.

**Background:** The novel MICRA AV leadless pacemaker can provide atrioventricular (AV) synchronous pacing using an accelerometer-based atrial sensing algorithm.

**Purpose:** To describe the performance of MICRA AV pacemaker in a real-life setting and to determine the agreement between AV synchrony determined by the device counters and AV synchrony obtained by a 24 h ECG Holter test.

**Methods:** This pilot study included the first ten patients implanted with a MICRA AV leadless pacemaker at our institution. All implants were performed according to standard protocols and under deep sedation. A close follow-up was performed, and atrial sensing parameters were adjusted following AV synchrony given by the device counters. Patients underwent a 24 h ECG Holter test once AV synchrony remained stable for at least two months. The ECG Holter signal was analyzed in a blinded manner by an automatic delineation system based on the wavelet transform (Figure). This algorithm has a sensitivity of 98.9% and a positive predictive value of 91.9% to detect p waves. Cardiac cycles were defined as synchronous if a QRS complex followed the P-wave by  $\leq 300$  ms, according to MARVEL 2 study criterion. AV synchrony obtained from the 24 h Holter test was compared with AV synchrony extracted from the device counters (AM-VP + AM-VS) during the same 24 h.

**Results:** From June to November 2020, 10 patients (7 males, mean age  $83.5 \pm 5.4$ ) were implanted with a MICRA AV leadless pacemaker (5 patients due to complete AV block and 5 patients due to second degree AV block). All devices were implanted after 1 deployment and no major complications appeared. Data related to implant parameters are displayed in Table 1. Device reprogramming was needed in all patients during follow-up. The 24 h ECG Holter monitoring was performed  $141.4 \pm 45$  days after the implant (mean time). Device settings and programming at Holter date is displayed in Table 1. Total ECG recorded time was 210.6 h and 915,488 cardiac cycles were analyzed. The mean percentage of synchronous cardiac cycles was  $88.6 \pm 8.5\%$  of total cycles while the mean AV synchrony determined by the device counters (AM-VP + AM-VS) during those 24 h was  $89.8 \pm 5.5\%$ . A good patient to patient correlation between these two measures was found (coefficient of intraclass correlation = 0.72).

**Conclusions:** We obtained high rates of AV synchrony with MICRA AV leadless pacemaker, in our short-term follow-up pilot study. Manual adjustment of the atrial sensing parameters, guided by the device counters, seems to be useful to obtain an optimal performance.

Table 1. Implant data and functioning/programming data at Holter date.

| Implant                                 |                                |
|-----------------------------------------|--------------------------------|
| • Fluoro time (mean $\pm$ SD)           | 9.2 $\pm$ 14.6 min             |
| • Location (n)                          |                                |
| o High-septum                           | 5                              |
| o Mid-septum                            | 3                              |
| o RVOT                                  | 2                              |
| • R wave (mean $\pm$ SD)                | 13 $\pm$ 4.4 mV                |
| • Impedance (mean $\pm$ SD)             | 1004 $\pm$ 273.7 Ohms          |
| • Threshold (x 0.24 ms) (mean $\pm$ SD) | 0.66 $\pm$ 0.43 Volts          |
| Holter date                             |                                |
| • R wave (mean $\pm$ SD)                | 16.1 $\pm$ 5.5 mV              |
| • Impedance (mean $\pm$ SD)             | 690 $\pm$ 214.9 Ohms           |
| • Threshold (x 0.24 ms) (mean $\pm$ SD) | 0.55 $\pm$ 0.51 Volts          |
| • AV conduction (n)                     |                                |
| o Intact                                | 1                              |
| o Paroxysmal AV block                   | 3                              |
| o 2 <sup>o</sup> degree AV block        | 5                              |
| o Complete AV block                     | 1                              |
| • Programming (n)                       |                                |
| o VDD 40/105                            | 7                              |
| o VDD 50/105                            | 3                              |
| • Vector (n)                            |                                |
| o 1+2                                   | 3                              |
| o 1+3                                   | 1                              |
| o 2+3                                   | 5                              |
| o 1+2+3                                 | 1                              |
| • A3 threshold (mean $\pm$ SD) *        | 8.0 $\pm$ 3.1 m/s <sup>2</sup> |
| • VE window (mean $\pm$ SD) **          | 620 $\pm$ 25.8 ms              |
| • A3 threshold (mean $\pm$ SD) *        | 2.9 $\pm$ 1.3 m/s <sup>2</sup> |
| • A4 amplitude (mean $\pm$ SD)          | 4.4 $\pm$ 1.4 m/s <sup>2</sup> |

\*Automatic  
\*\*Fix

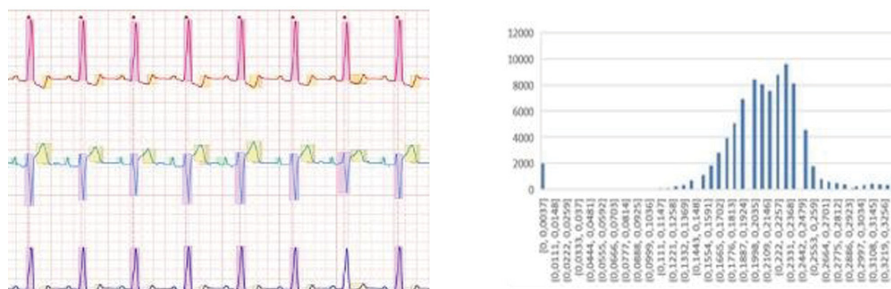

Figure. Example of the automatic ECG waves delineation performed by the wavelet transform algorithm (left). P-QRS intervals histogram (right) obtained after ECG analysis.
